Table S1. Mean ( $\pm$  s.e.m.) wet weight percentage of body water, ash, fat and protein in fasted (FU) and fed (FF) Arctic charr sampled in March, May (only FU fish) and June

|          | March          |                | May            |    | June            |                |
|----------|----------------|----------------|----------------|----|-----------------|----------------|
|          | FU             | FF             | FU             | FF | FU              | FF             |
| Water    | 76.1 $\pm$ 0.5 | 76.6 $\pm$ 0.5 | 77.4 $\pm$ 0.6 | –  | 80.7 $\pm$ 0.5  | 71.4 $\pm$ 1.4 |
| Ash      | 1.9 $\pm$ 0.2  | 1.7 $\pm$ 0.1  | 1.7 $\pm$ 0.1  | –  | 1.9 $\pm$ 0.3   | 1.6 $\pm$ 0.3  |
| Fat      | 4.8 $\pm$ 0.5  | 4.6 $\pm$ 0.5  | 3.8 $\pm$ 0.6  | –  | 1.2 $\pm$ 0.4   | 10.4 $\pm$ 1.5 |
| Protein* | 17.2 $\pm$ 0.2 | 17.1 $\pm$ 0.3 | 17.2 $\pm$ 0.2 | –  | 16.1 $\pm$ 0.28 | 16.4 $\pm$ 0.5 |

\*Protein percentage calculated by difference.

Table S2. Mean ( $\pm$  s.e.m.) body mass ( $M_b$ ) and condition factor (CF) of FU fish sampled in May and June, and their respective  $M_b$  and CF in March, May and June, and the  $M_b$  and CF in March and June of the FF fish sampled in June

|                         | March                         | May                          | June                          |
|-------------------------|-------------------------------|------------------------------|-------------------------------|
| FU fish                 |                               |                              |                               |
| Sampled May ( $N=10$ )  |                               |                              |                               |
| $M_b$                   | 154.0 $\pm$ 5.6               | 151.7 $\pm$ 6.5              |                               |
| CF                      | 0.88 $\pm$ 0.01               | 0.86 $\pm$ 0.02              |                               |
| Sampled June ( $N=10$ ) |                               |                              |                               |
| $M_b$                   | 155.4 $\pm$ 9.3               | 149.0 $\pm$ 9.0              | 138.1 $\pm$ 7.5               |
| CF                      | 0.88 $\pm$ 0.01 <sup>a</sup>  | 0.83 $\pm$ 0.01 <sup>b</sup> | 0.75 $\pm$ 0.01 <sup>c</sup>  |
| FF fish                 |                               |                              |                               |
| Sampled June ( $N=7$ )  |                               |                              |                               |
| $M_b$                   | 164.8 $\pm$ 15.3 <sup>a</sup> |                              | 338.7 $\pm$ 52.3 <sup>b</sup> |
| CF                      | 0.95 $\pm$ 0.03 <sup>a</sup>  |                              | 1.20 $\pm$ 0.06 <sup>b</sup>  |

Different letters denote significant differences between sampling dates.
